# Supplementary material
Source: PubMed Central journal article supplement (PMC4330576)
Supplement: supp_tpc.114.132787_tpc132787_SupplementalData.pdf [file supp_tpc.114.132787_tpc132787_SupplementalData.pdf]

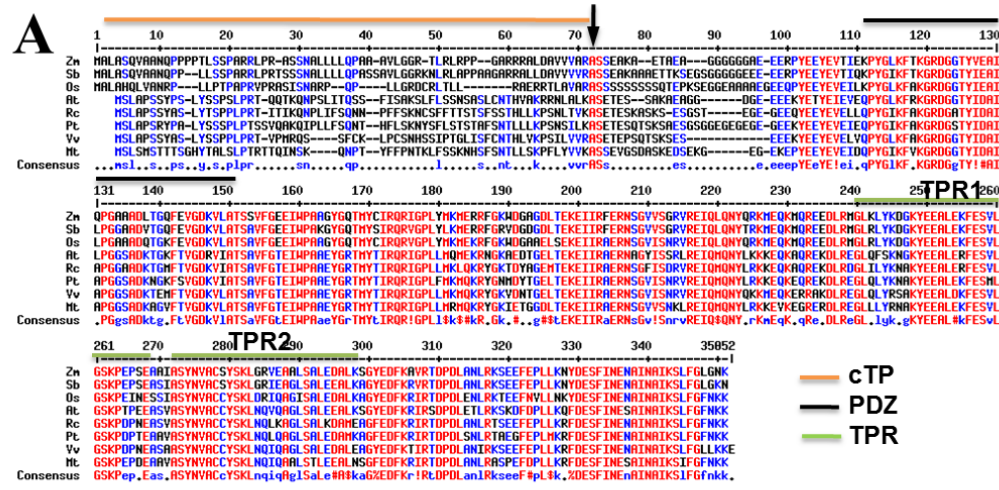

**B** From PPDB at <http://ppdb.tc.cornell.edu/> (internal data)

TargetP predicted cleavage site

Rice MET1

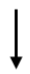

Sequence coverage is 52%, when calculated for the mature protein (start position A56)

**Supplemental Figure 1.** Sequence alignment of the MET1 homologs in selected monocots and dicots and experimental sequence coverage of rice MET1.

- (A) Sequence alignment of the MET1 homologs in 4 selected monocots (*Sorghum bicolor* - Sb, *Oryza sativa* - Os, *Zea mays* - Zm) and 6 dicots (*Arabidopsis thaliana* - At, *Glycine max* - Gm, *Populus trichocarpa* - Pt, *Vitis vinifera* - Vv, *Medicago truncatula* - Mt, *Ricinus communis* - Rc). The alignment was created using Multialin (Corpet, 1988). High and low consensus residues are shown in red and blue, respectively. cTP – chloroplast transit peptide.
- (B) Protein sequence coverage of rice MET1 (Os07g07540) determined by MS/MS of the proteome of isolated chloroplasts and total leaf samples.

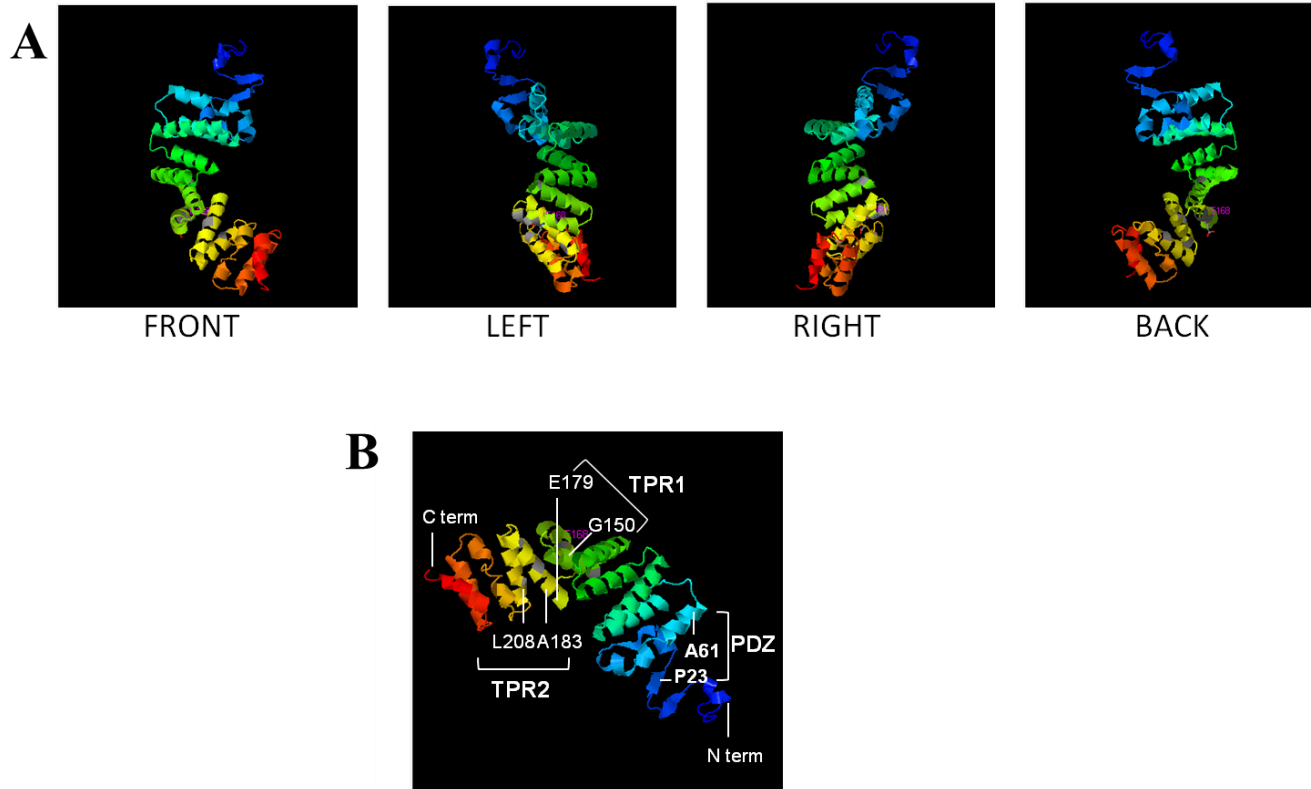

**Supplemental Figure 2.** Structural model for mature MET1 generated by i-TASSER (<http://zhanglab.ccmb.med.umich.edu/I-TASSER/>). The best model (confidence score -2.10) was selected among five predicted models.

**(A)** Different side views of the model

**(B)** PDZ (from P23 to A61) and TPR domains (from G150 to E179: TPR1 and from A183 to L208: TPR2) in the structure. MET1 does not have any predicted transmembrane domain but the C-terminal end is rich in hydrophobic amino acids and conserved among all species.



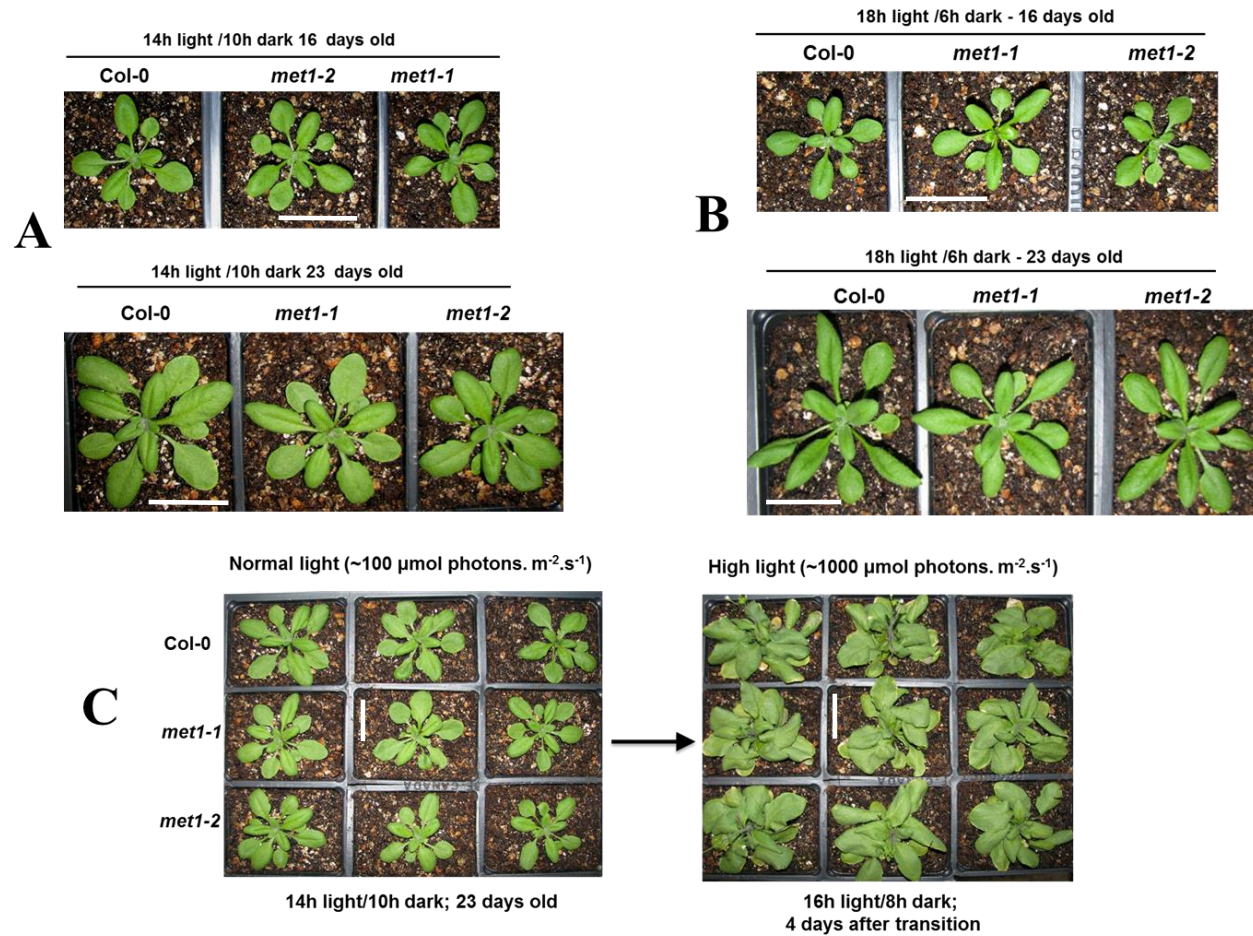

**Supplemental Figure 4.** Testing the effect of different light regimes on growth and development of *met1-1* and *met1-2*. The size bars correspond to 3 cm. **(A,B)** Phenotypes of wt, *met1-1*, *met1-2* plants at 16 days and 23 days old grown under a light/dark cycle of 14h light/10 h dark **(A)** or 18 h light/6 h dark **(B)** with light intensity of  $\sim 100 \mu\text{mol photon}\cdot\text{m}^{-2}\cdot\text{s}^{-1}$ . **(C)** Phenotypes of wt, *met1-1*, *met1-2* plants grown at  $\sim 100 \mu\text{mol photon}\cdot\text{m}^{-2}\cdot\text{s}^{-1}$  at 14h light/10 h dark and 4 days after transfer to 10-fold higher light intensity and an increased light period (18 h light/6 h dark).

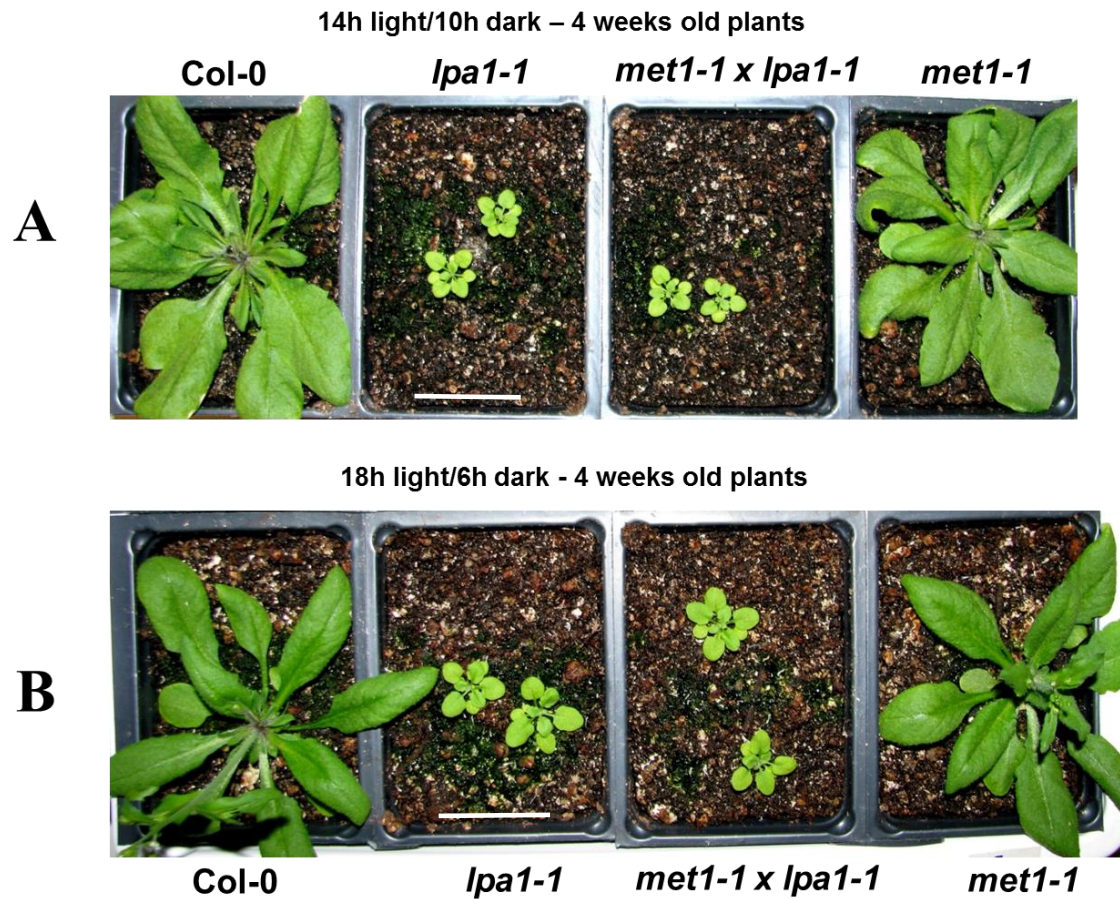

**Supplemental Figure 5.** Growth and developmental phenotypes of single and double mutants in *LPA1* and *MET1*. **(A,B)** Phenotypes of 4 week old wt, *lpa1-1*, *met1-1*, and *met1-1 x lpa1-1* at 14h light/10 h dark **(A)** and 18 h light/6 h dark **(B)** grown at  $\sim 80 \mu\text{mol photons m}^{-2} \text{ s}^{-1}$  light intensity. The size bars correspond to 3 cm.

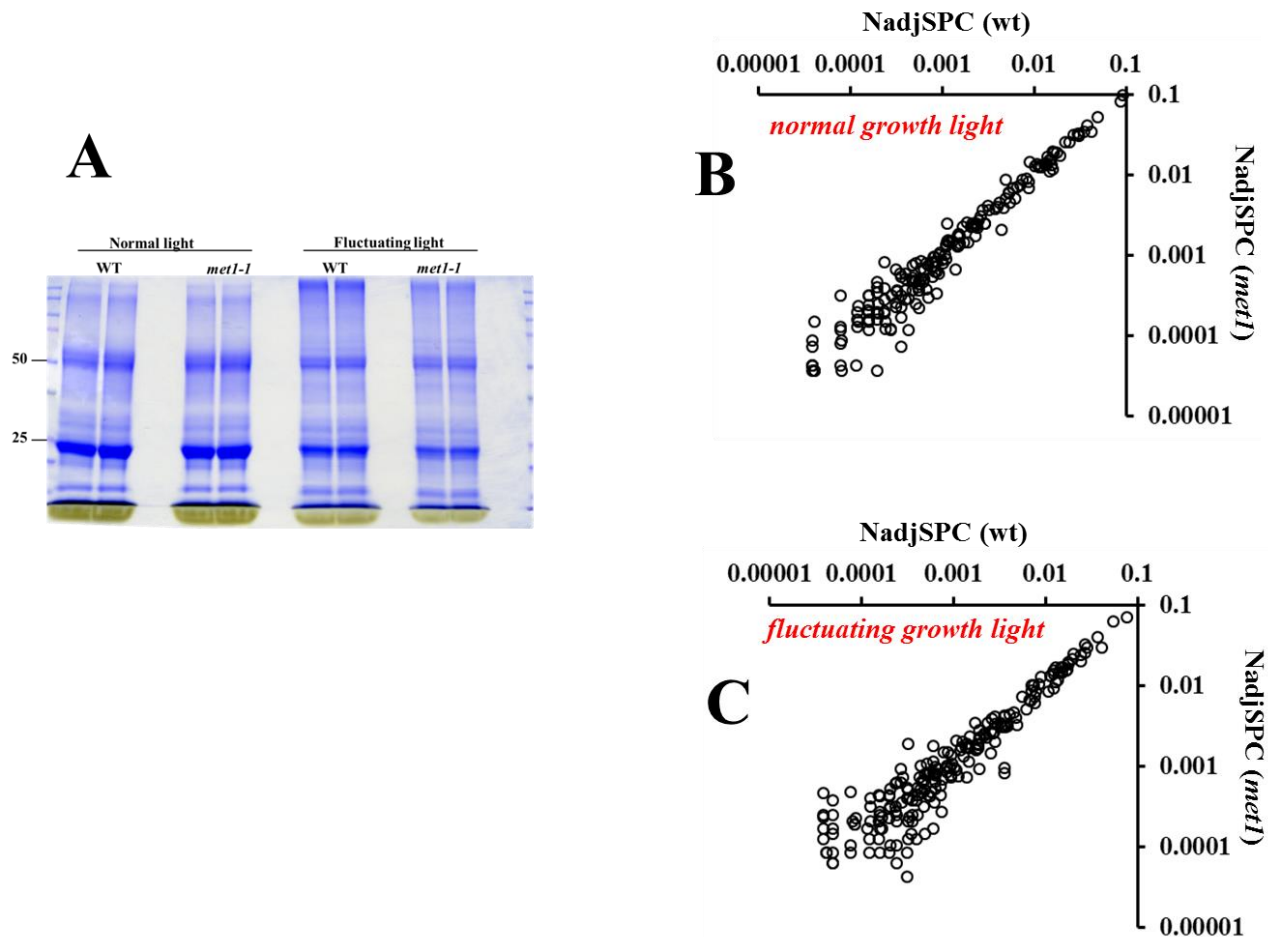

**Supplemental Figure 6.** Scatter plots and Coomassie stained SDS-PAGE gel with 60  $\mu$ g proteins of isolated thylakoid proteins of wt and *met1-1* grown on soil under normal light or fluctuating growth light used for MS/MS analysis and quantification by label-free spectral counting. **(A)** SDS-PAGE gels of thylakoid proteins. **(B,C)** Scatter plots of normalized protein abundances (as measured by NadjSPC) for wt and *met1-1* of plants grown under normal light conditions **(B)** or fluctuating light conditions **(C)**.

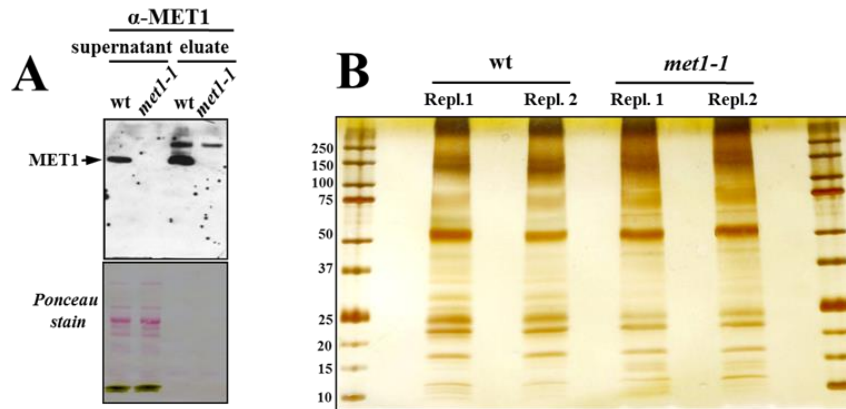

**Supplemental Figure 7.** Identification of MET1-1 candidate protein interactors.

**(A)** High enrichment of MET1 using anti-MET1 serum against thylakoids solubilized by DM.

**(B)** Silverstain of an SDS-PAGE gel with co-immunoprecipitates with anti-MET1 serum used for MS/MS analysis in wt. *met1-1* was used as negative control.

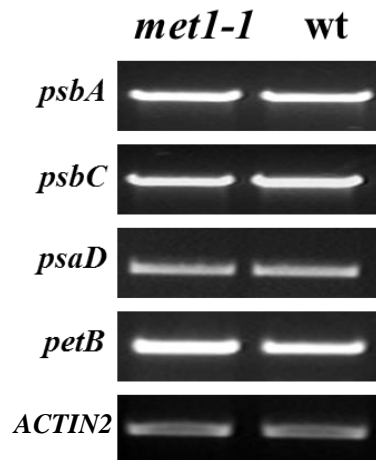

**Supplemental Figure 8.** Accumulation of selected plastid gene transcripts in wt and *met1-1* mutant as determined by RT-PCR.

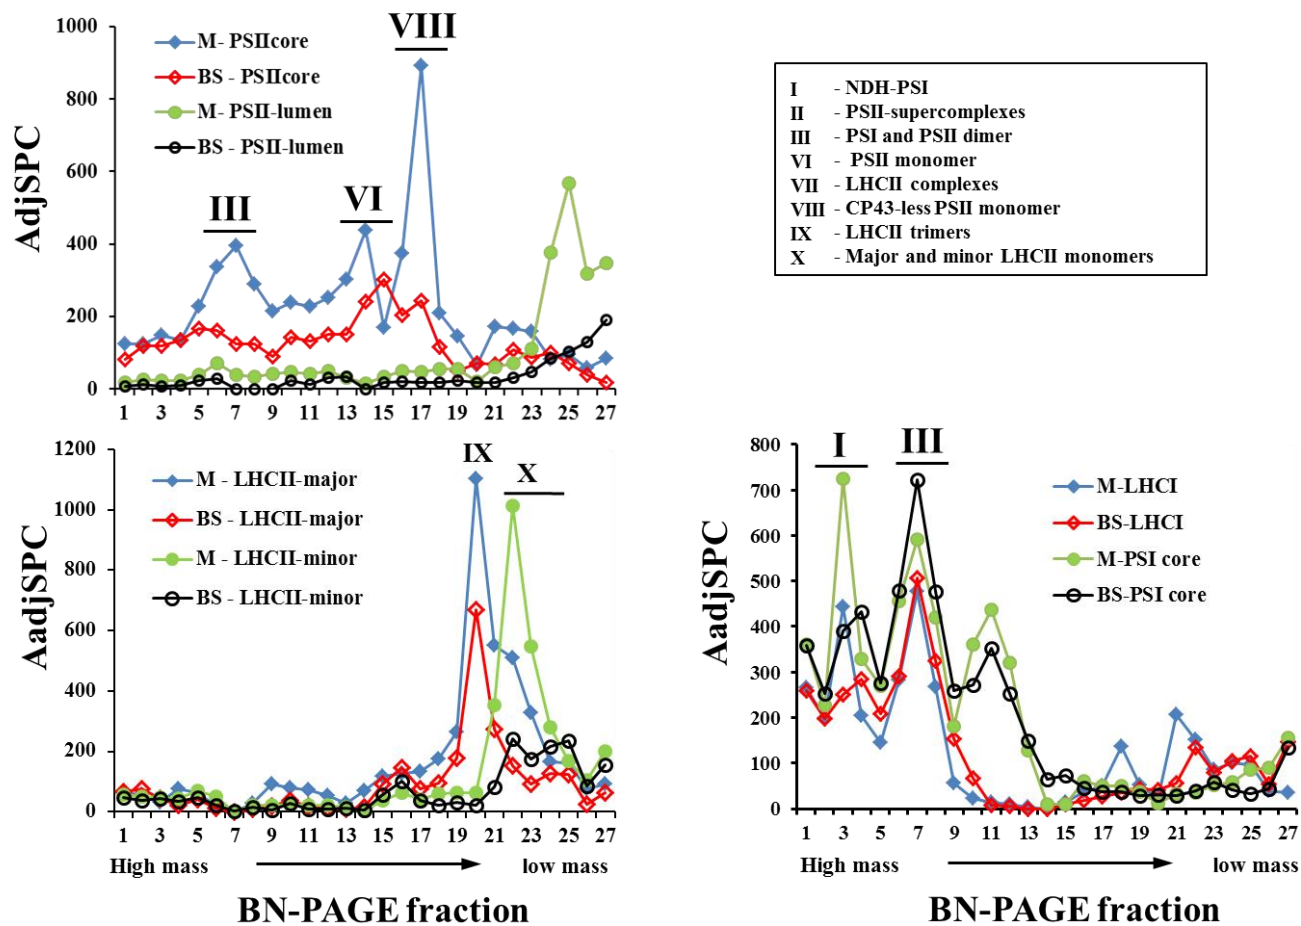

**Supplemental Figure 9.** MS/MS analysis of BN-PAGE gel lanes of maize mesophyll and bundle sheath thylakoids. Original mass spectrometry data are from (Majeran et al., 2008). Profiles for the integral membrane proteins of the PSII core, thylakoid lumen proteins of the water splitting complex of PSII, the minor LHCs (CP24,26,29) and major LHCs, PSI core proteins and LHI proteins are shown.



**Supplemental Table 1.** Primers used for genotyping, RT-PCR analysis and cloning of the MET1 antigen.

| <b>Primer name</b>                                | <b>Sequence (5'-3') Forward</b>    | <b>Sequence (5'-3') Reverse</b>        |
|---------------------------------------------------|------------------------------------|----------------------------------------|
| <i>MET1</i> antiserum                             | GGATCCATGTCCTTTAGCTCCGAGCAGTTATCCA | TCTCGAGATACTTACCACTTCTTGAAAAATTGCAG    |
| <i>MET1</i> RT-PCR                                | ATGTCCTTTAGCTCCGAGCAGTTATC         | TTTCTTGTTAAAGCCAAACAAGGAT              |
| <i>ACTIN2</i> RT-PCR                              | CAAACGAGGGCTGGAAACAAGACT           | GCAACTGGGATGATATGGAAAAGA               |
| <i>LPA1</i> RT-PCR                                | ATGGCTGTGGCTACAGCTCCGT             | TCTTTCTAACTTGCTGAGAACGTCA              |
| <i>LPA1</i> genotyping (Gene specific)            | TAGTTCCTGTGGTATGGGGTG              | TCTTCTCTCCAACGACCATG                   |
| <i>LPA1</i> genotyping (Gene specific and TDNA)   | TAGTTCCTGTGGTATGGGGTG              | AACGTCCGCAATGTGTTATTAAGTTGTC           |
| <i>MET1-1</i> genotyping (Gene specific)          | GGACAA TGTA CACAA TTCGT CAG        | TTTCTTGTTAAAGCCAAACAAGGAT              |
| <i>MET1-1</i> genotyping (Gene specific and TDNA) | GGACAA TGTA CACAA TTCGT CAG        | TAGCATCTGAA TTTCA TAA CCAA TCTCGATACAC |
| <i>MET1-2</i> genotyping (Gene specific)          | TTTCTTGTTAAAGCCAAACAAGGAT          | GGACAATGTACACAA TTCGT CAG              |
| <i>MET1-2</i> genotyping (Gene specific and TDNA) | TTTCTTGTTAAAGCCAAACAAGGAT          | TGATCCA TG TAGA TTTCCCGGACATGAAG       |
| <i>psaD</i> RT-PCR                                | GCCGAGAAAA CAGAGT CCTCTC           | CAAA TCA TAA GAT TGT TTTCCA            |
| <i>psbC</i> RT-PCR                                | GGAGCTCATG TAGCCCATG               | GTAAAGAGGAGTCA TGGAAA G                |
| <i>psbA</i> RT-PCR                                | GAGAGACGCGAAAGCGAAAG               | TCCATTTGTAGATGGAGCCTCA                 |
| <i>petB</i> RT-PCR                                | GTA GCTACGGGATTTGCTATGACT          | TAAGGGACCAGAAATACCTTGCTT               |
